# Supplementary material for: Hydrothermal deoxygenation of graphene oxide in sub- and supercritical water
Source: Royal Society of Chemistry journal article supplement (doi:10.1039/c4ra01085j), 2014-01-01
Supplement: c4ra01085j1.pdf [file c4ra01085j1.pdf]

Supporting Information

for

**Hydrothermal Deoxygenation of Graphene Oxide in  
Sub- and Supercritical Water**

Harshal P. Mungse, Om P. Sharma, Hiroyuki Sugimura and Om P. Khatri\*

Figure S1

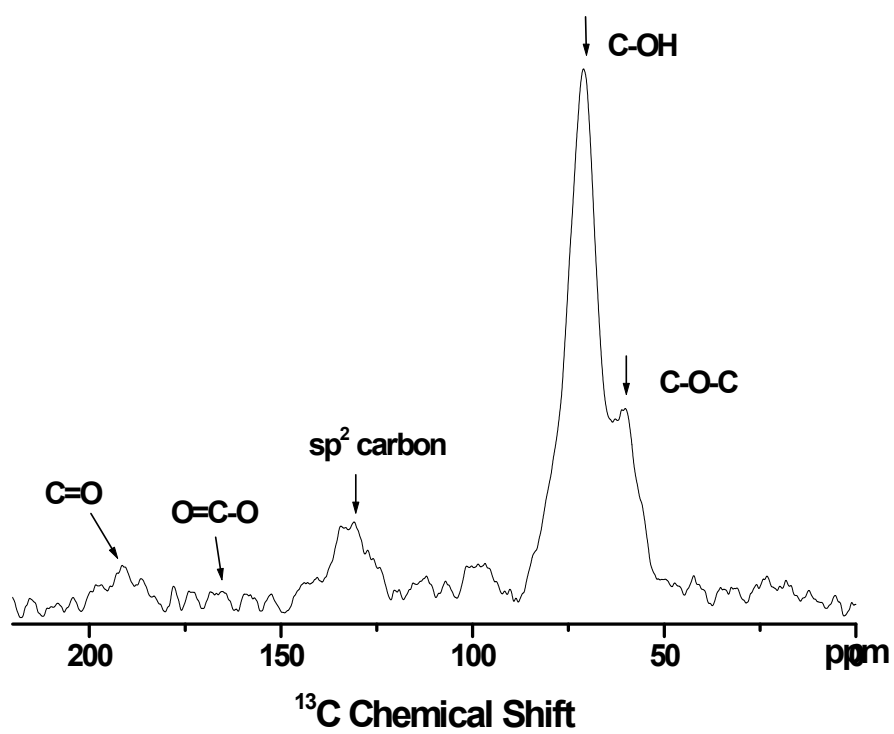

Figure S1:  $^{13}\text{C}$  SS NMR spectra of graphene oxide

Figure S2

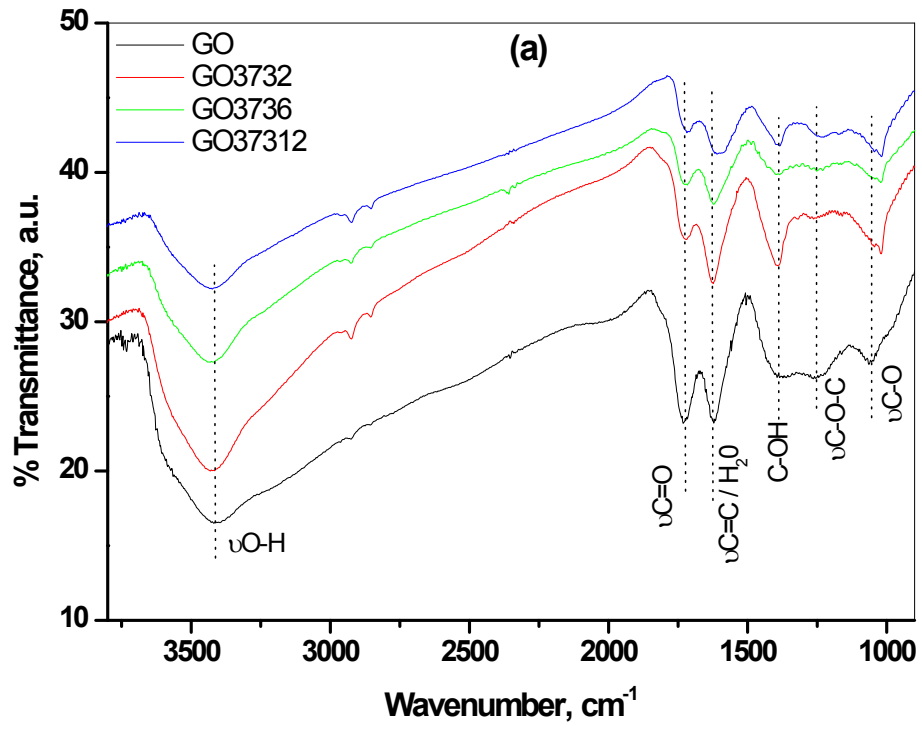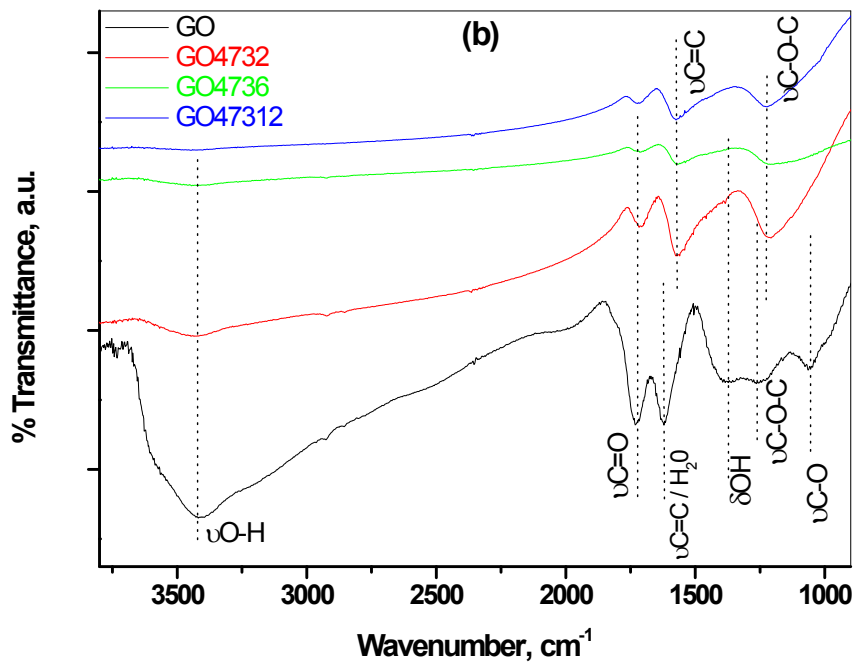

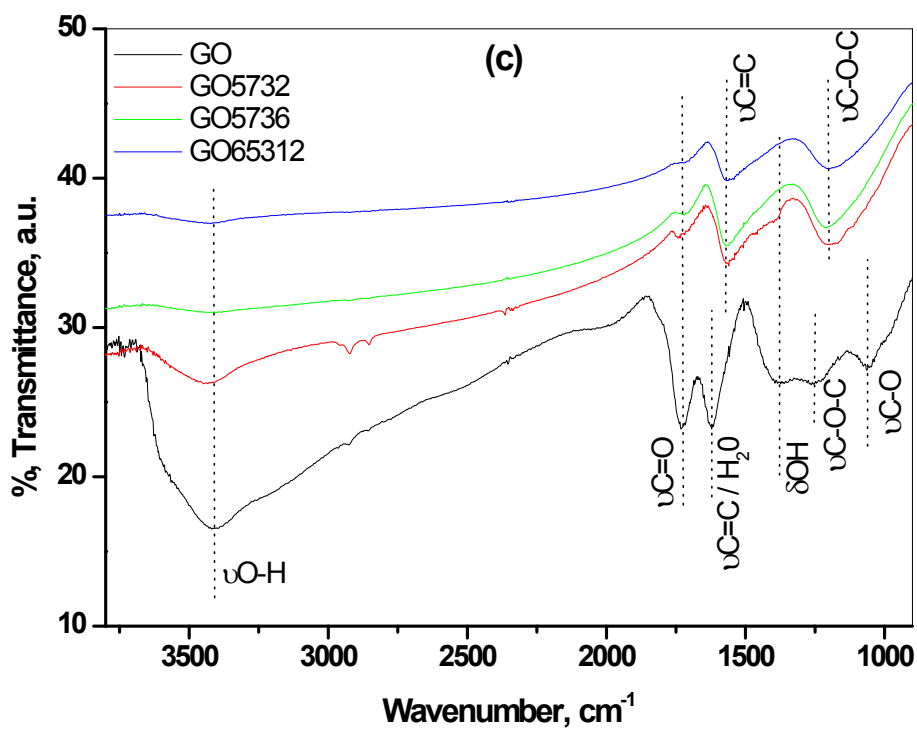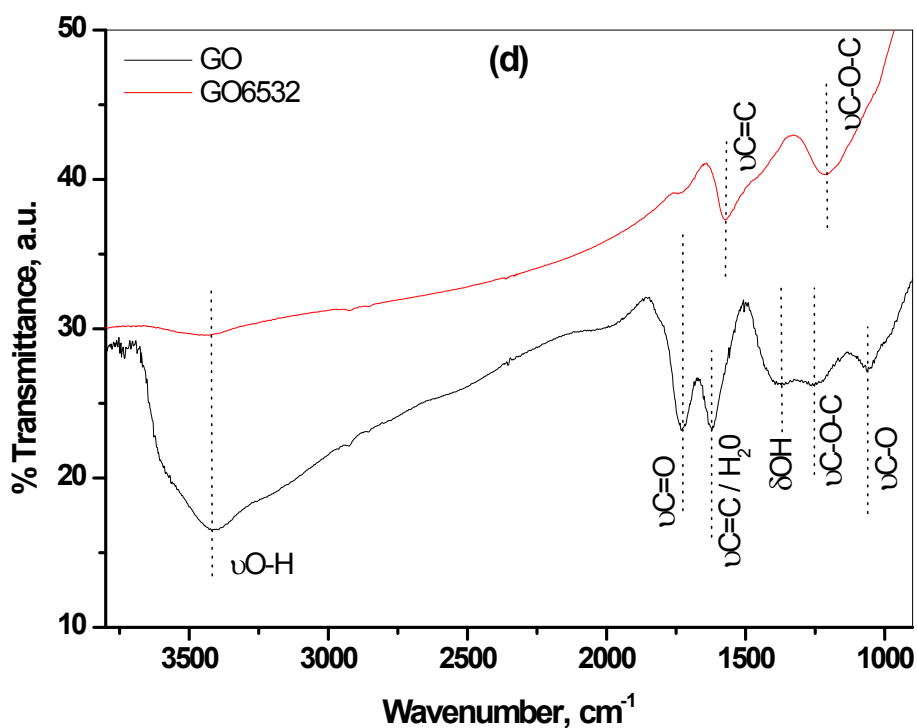

**Figure S2.** FTIR spectra of GO and its deoxygenated samples, prepared by hydrothermal treatment with superheated water at (a) 373 K, (b) 473 K, (c) 573 K, and supercritical water (d) 653 K for variable time period.

Figure S3

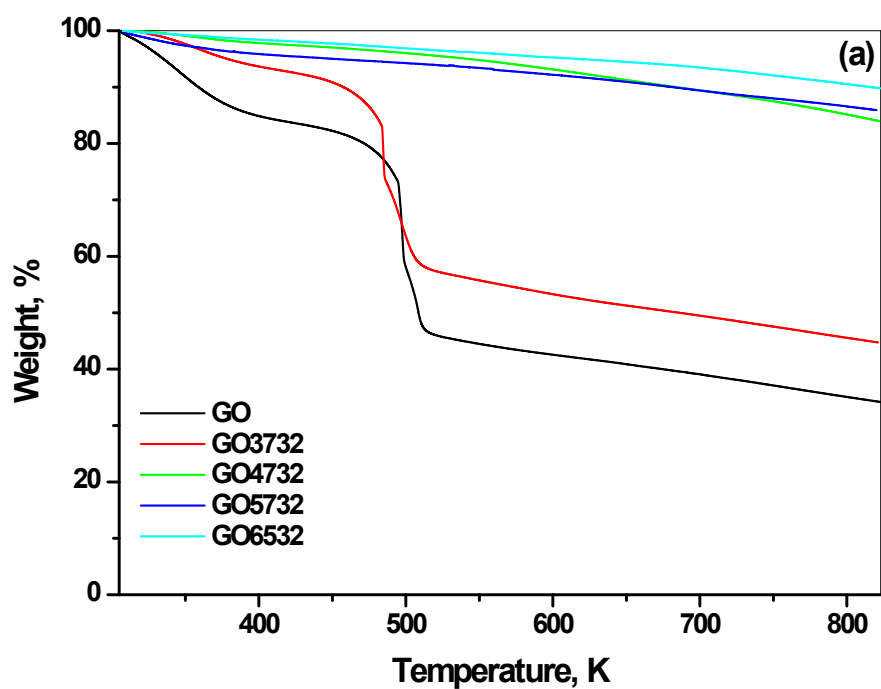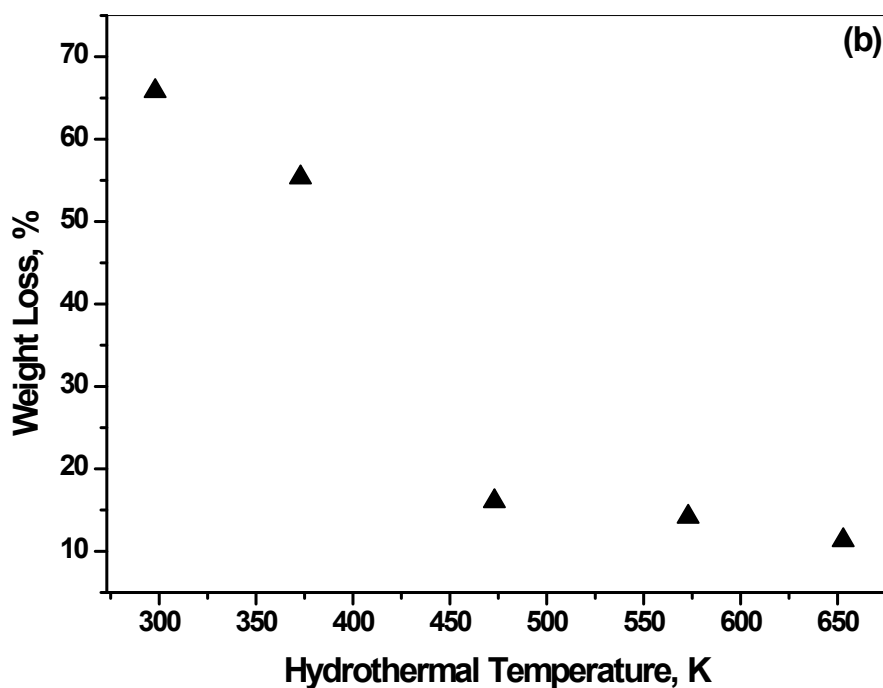

**Figure S3.** (a) Thermo-gravimetric analyses of GO and its deoxygenated samples, prepared by hydrothermal treatment with superheated and supercritical water, and (b) % weight loss of GO and its deoxygenated samples in the range of 298 - 823 K under nitrogen atmosphere at thermal rate of 5°/minute.

**Table S1:** Characterization of the products obtained by hydrothermal treatment of GO at variable temperature

---

| No. | Sample | BET Surface Area,<br>$\text{m}^2 \cdot \text{g}^{-1}$ | Total Pore<br>Volume, $\text{cm}^3 \cdot \text{g}^{-1}$ | TGA, Weight Loss at<br>823 K <sup>1</sup> , % |
|-----|--------|-------------------------------------------------------|---------------------------------------------------------|-----------------------------------------------|
| 1   | GO3732 | 39.4                                                  | 0.043                                                   | 55.3                                          |
| 2   | GO4732 | 241.0                                                 | 0.174                                                   | 16.1                                          |
| 3   | GO5732 | 365.5                                                 | 0.297                                                   | 14.2                                          |
| 4   | GO6532 | 474.0                                                 | 1.903                                                   | 11.3                                          |

<sup>1</sup>Weight loss in the thermal range of 298 - 823 K under nitrogen atmosphere. These values are extracted from their TGA pattern.

---
